# Supplementary material for: Arrays of giant octagonal and square cylinders by liquid crystalline self-assembly of X-shaped polyphilic molecules
Source: Springer Nature journal article supplement (doi:10.1038/ncomms2096), 2012-10-01
Supplement: 41467_2012_BFncomms2096_MOESM7_ESM.mol [file 41467_2012_BFncomms2096_MOESM7_ESM.mol]

  ChemDraw09141208062D

 91 93  0  0  0  0  0  0  0  0999 V2000
   -4.0643    0.2959    0.0000 C   0  0  0  0  0  0  0  0  0  0  0  0
   -4.2285   -0.5126    0.0000 C   0  0  0  0  0  0  0  0  0  0  0  0
   -3.6104   -1.0590    0.0000 C   0  0  0  0  0  0  0  0  0  0  0  0
   -2.8281   -0.7969    0.0000 C   0  0  0  0  0  0  0  0  0  0  0  0
   -2.6639    0.0116    0.0000 C   0  0  0  0  0  0  0  0  0  0  0  0
   -3.2821    0.5580    0.0000 C   0  0  0  0  0  0  0  0  0  0  0  0
   -1.8817    0.2737    0.0000 C   0  0  0  0  0  0  0  0  0  0  0  0
   -1.2636   -0.2727    0.0000 C   0  0  0  0  0  0  0  0  0  0  0  0
   -0.4813   -0.0107    0.0000 C   0  0  0  0  0  0  0  0  0  0  0  0
   -0.3172    0.7978    0.0000 C   0  0  0  0  0  0  0  0  0  0  0  0
   -0.9353    1.3443    0.0000 C   0  0  0  0  0  0  0  0  0  0  0  0
   -1.7175    1.0822    0.0000 C   0  0  0  0  0  0  0  0  0  0  0  0
    0.4651    1.0599    0.0000 C   0  0  0  0  0  0  0  0  0  0  0  0
    1.0832    0.5135    0.0000 C   0  0  0  0  0  0  0  0  0  0  0  0
    1.8655    0.7756    0.0000 C   0  0  0  0  0  0  0  0  0  0  0  0
    2.0296    1.5841    0.0000 C   0  0  0  0  0  0  0  0  0  0  0  0
    1.4115    2.1305    0.0000 C   0  0  0  0  0  0  0  0  0  0  0  0
    0.6293    1.8684    0.0000 C   0  0  0  0  0  0  0  0  0  0  0  0
    2.8119    1.8462    0.0000 O   0  0  0  0  0  0  0  0  0  0  0  0
   -5.0107   -0.7747    0.0000 O   0  0  0  0  0  0  0  0  0  0  0  0
   -5.6288   -0.2283    0.0000 C   0  0  0  0  0  0  0  0  0  0  0  0
   -6.4111   -0.4903    0.0000 C   0  0  0  0  0  0  0  0  0  0  0  0
   -6.5753   -1.2988    0.0000 C   0  0  0  0  0  0  0  0  0  0  0  0
   -7.0292    0.0561    0.0000 O   0  0  0  0  0  0  0  0  0  0  0  0
   -7.3575   -1.5609    0.0000 O   0  0  0  0  0  0  0  0  0  0  0  0
    3.4300    1.2998    0.0000 C   0  0  0  0  0  0  0  0  0  0  0  0
    4.2123    1.5619    0.0000 C   0  0  0  0  0  0  0  0  0  0  0  0
    4.3764    2.3704    0.0000 C   0  0  0  0  0  0  0  0  0  0  0  0
    5.1587    2.6325    0.0000 O   0  0  0  0  0  0  0  0  0  0  0  0
    4.8304    1.0155    0.0000 O   0  0  0  0  0  0  0  0  0  0  0  0
   -2.3356    1.6286    0.0000 O   0  0  0  0  0  0  0  0  0  0  0  0
   -9.3139    3.0455    0.0000 C   0  0  0  0  0  0  0  0  0  0  0  0
   -8.6979    2.5009    0.0000 C   0  0  0  0  0  0  0  0  0  0  0  0
   -7.9183    2.7621    0.0000 C   0  0  0  0  0  0  0  0  0  0  0  0
   -7.3022    2.2175    0.0000 C   0  0  0  0  0  0  0  0  0  0  0  0
   -6.5226    2.4787    0.0000 C   0  0  0  0  0  0  0  0  0  0  0  0
   -5.9066    1.9341    0.0000 C   0  0  0  0  0  0  0  0  0  0  0  0
   -5.1270    2.1953    0.0000 C   0  0  0  0  0  0  0  0  0  0  0  0
   -4.5109    1.6508    0.0000 C   0  0  0  0  0  0  0  0  0  0  0  0
   -3.7313    1.9120    0.0000 C   0  0  0  0  0  0  0  0  0  0  0  0
   -3.1153    1.3674    0.0000 C   0  0  0  0  0  0  0  0  0  0  0  0
    0.1368   -0.5571    0.0000 O   0  0  0  0  0  0  0  0  0  0  0  0
    0.9164   -0.2959    0.0000 C   0  0  0  0  0  0  0  0  0  0  0  0
    1.5324   -0.8404    0.0000 C   0  0  0  0  0  0  0  0  0  0  0  0
    2.3121   -0.5792    0.0000 C   0  0  0  0  0  0  0  0  0  0  0  0
    2.9281   -1.1238    0.0000 C   0  0  0  0  0  0  0  0  0  0  0  0
    3.7077   -0.8626    0.0000 C   0  0  0  0  0  0  0  0  0  0  0  0
    4.3238   -1.4072    0.0000 C   0  0  0  0  0  0  0  0  0  0  0  0
    5.1034   -1.1460    0.0000 C   0  0  0  0  0  0  0  0  0  0  0  0
    5.7194   -1.6906    0.0000 C   0  0  0  0  0  0  0  0  0  0  0  0
    6.5017   -1.4285    0.0000 C   0  0  0  0  0  0  0  0  0  0  0  0
    7.1198   -1.9749    0.0000 C   0  0  0  0  0  0  0  0  0  0  0  0
    7.9021   -1.7128    0.0000 C   0  0  0  0  0  0  0  0  0  0  0  0
    8.5202   -2.2592    0.0000 C   0  0  0  0  0  0  0  0  0  0  0  0
    9.3024   -1.9971    0.0000 C   0  0  0  0  0  0  0  0  0  0  0  0
    9.9205   -2.5435    0.0000 C   0  0  0  0  0  0  0  0  0  0  0  0
   10.7028   -2.2815    0.0000 C   0  0  0  0  0  0  0  0  0  0  0  0
   11.3209   -2.8279    0.0000 C   0  0  0  0  0  0  0  0  0  0  0  0
   12.1032   -2.5658    0.0000 C   0  0  0  0  0  0  0  0  0  0  0  0
   12.7213   -3.1122    0.0000 C   0  0  0  0  0  0  0  0  0  0  0  0
    4.8114   -0.3744    0.0000 F   0  0  0  0  0  0  0  0  0  0  0  0
    5.7800   -0.6788    0.0000 F   0  0  0  0  0  0  0  0  0  0  0  0
    6.1398   -0.6871    0.0000 F   0  0  0  0  0  0  0  0  0  0  0  0
    7.1560   -0.9305    0.0000 F   0  0  0  0  0  0  0  0  0  0  0  0
    7.5293   -0.9768    0.0000 F   0  0  0  0  0  0  0  0  0  0  0  0
    8.5527   -1.2101    0.0000 F   0  0  0  0  0  0  0  0  0  0  0  0
    9.1274   -1.1909    0.0000 F   0  0  0  0  0  0  0  0  0  0  0  0
   10.0117   -1.5813    0.0000 F   0  0  0  0  0  0  0  0  0  0  0  0
   10.3561   -1.5328    0.0000 F   0  0  0  0  0  0  0  0  0  0  0  0
   11.3621   -1.7902    0.0000 F   0  0  0  0  0  0  0  0  0  0  0  0
   11.8767   -1.7725    0.0000 F   0  0  0  0  0  0  0  0  0  0  0  0
   12.7987   -2.1273    0.0000 F   0  0  0  0  0  0  0  0  0  0  0  0
   13.5009   -2.8510    0.0000 F   0  0  0  0  0  0  0  0  0  0  0  0
   12.4625   -3.8956    0.0000 F   0  0  0  0  0  0  0  0  0  0  0  0
   13.3039   -3.6924    0.0000 F   0  0  0  0  0  0  0  0  0  0  0  0
   10.7483   -3.4218    0.0000 F   0  0  0  0  0  0  0  0  0  0  0  0
   11.7601   -3.5230    0.0000 F   0  0  0  0  0  0  0  0  0  0  0  0
    9.3848   -3.1710    0.0000 F   0  0  0  0  0  0  0  0  0  0  0  0
   10.3805   -3.2251    0.0000 F   0  0  0  0  0  0  0  0  0  0  0  0
    7.8698   -2.7669    0.0000 F   0  0  0  0  0  0  0  0  0  0  0  0
    8.9093   -2.9835    0.0000 F   0  0  0  0  0  0  0  0  0  0  0  0
    6.4166   -2.4063    0.0000 F   0  0  0  0  0  0  0  0  0  0  0  0
    7.4676   -2.7199    0.0000 F   0  0  0  0  0  0  0  0  0  0  0  0
    5.0761   -2.2071    0.0000 F   0  0  0  0  0  0  0  0  0  0  0  0
    6.1135   -2.4122    0.0000 F   0  0  0  0  0  0  0  0  0  0  0  0
  -10.0936    2.7843    0.0000 C   0  0  0  0  0  0  0  0  0  0  0  0
  -10.7096    3.3288    0.0000 C   0  0  0  0  0  0  0  0  0  0  0  0
  -11.4892    3.0676    0.0000 C   0  0  0  0  0  0  0  0  0  0  0  0
  -12.1052    3.6122    0.0000 C   0  0  0  0  0  0  0  0  0  0  0  0
  -12.8849    3.3510    0.0000 C   0  0  0  0  0  0  0  0  0  0  0  0
  -13.5009    3.8956    0.0000 C   0  0  0  0  0  0  0  0  0  0  0  0
  1  2  2  0      
  2  3  1  0      
  3  4  2  0      
  4  5  1  0      
  5  6  2  0      
  6  1  1  0      
  5  7  1  0      
  7  8  1  0      
  8  9  2  0      
  9 10  1  0      
 10 11  2  0      
 11 12  1  0      
 12  7  2  0      
 10 13  1  0      
 13 14  1  0      
 14 15  2  0      
 15 16  1  0      
 16 17  2  0      
 17 18  1  0      
 18 13  2  0      
 16 19  1  0      
  2 20  1  0      
 20 21  1  0      
 21 22  1  0      
 22 23  1  0      
 22 24  1  0      
 23 25  1  0      
 19 26  1  0      
 26 27  1  0      
 27 28  1  0      
 28 29  1  0      
 27 30  1  0      
 12 31  1  0      
  9 42  1  0      
 31 41  1  0      
 32 33  1  0      
 33 34  1  0      
 34 35  1  0      
 35 36  1  0      
 36 37  1  0      
 37 38  1  0      
 38 39  1  0      
 39 40  1  0      
 40 41  1  0      
 42 43  1  0      
 43 44  1  0      
 44 45  1  0      
 45 46  1  0      
 46 47  1  0      
 47 48  1  0      
 48 49  1  0      
 49 50  1  0      
 50 51  1  0      
 51 52  1  0      
 52 53  1  0      
 53 54  1  0      
 54 55  1  0      
 55 56  1  0      
 56 57  1  0      
 57 58  1  0      
 58 59  1  0      
 59 60  1  0      
 49 61  1  0      
 49 62  1  0      
 51 63  1  0      
 51 64  1  0      
 53 65  1  0      
 53 66  1  0      
 55 67  1  0      
 55 68  1  0      
 57 69  1  0      
 57 70  1  0      
 59 71  1  0      
 59 72  1  0      
 60 73  1  0      
 60 74  1  0      
 60 75  1  0      
 58 76  1  0      
 58 77  1  0      
 56 78  1  0      
 56 79  1  0      
 54 80  1  0      
 54 81  1  0      
 52 82  1  0      
 52 83  1  0      
 50 84  1  0      
 50 85  1  0      
 32 86  1  0      
 86 87  1  0      
 87 88  1  0      
 88 89  1  0      
 89 90  1  0      
 90 91  1  0      
M  END
